# Supplementary material
Source: PubMed Central journal article supplement (PMC2447006)
Supplement: supp_190_14_4849__1.pdf [file supp_190_14_4849__1.pdf]

## SUPPLEMENTARY TABLES

Suppl. Table I. Primers used in this study.

| Primer | Name            | Sequence (5'→3')               | Applications                 |
|--------|-----------------|--------------------------------|------------------------------|
| 1      | Spyo/HEF-Hup    | ACATATGATTACAGTATATTCC         | Linkage RT-PCR               |
| 2      | Spyo/HEF-Eintlw | GGAACGGTAATCCCTAGTGAC          | Linkage RT-PCR               |
| 3      | Spyo/HEF-Eintup | GGATGATGGGGAAGAAGTGGGCG        | Linkage RT-PCR               |
| 4      | Spyo/HEF-Fintlw | GAGGAGTGCGAACATCAGCACG         | Linkage RT-PCR               |
| 5      | Spyo/FIE-Fintup | GACCGTGCCCGTGTCTTGATTCC        | Linkage RT-PCR               |
| 6      | Spyo/FIE-Eintlw | CCAATTGATGGAGCGCAACTG          | Linkage RT-PCR               |
| 7      | Spyo/I2up       | CATATGCCTCAGATTACCCTTG         | Linkage RT-PCR               |
| 8      | Spyo/I2lw       | GGATCCATGGACTGTCTAGCTG         | Linkage RT-PCR               |
| 9      | Spyo/HEF-Fup    | ACATATGACTACATATTATGAAGC       | Protein overproduction       |
| 10     | Spyo/HEF-Flw    | AGGATCCTGAGCACTATTAGAGTC       | Protein overproduction       |
| 11     | Spyo/HEF-Eup    | ACATATGAGTCTCAAAGATCTTGG       | Protein overproduction       |
| 12     | Spyo/HEF-Elw    | AGGATCCTTACTTCTTAACCAATTAATG   | Protein overproduction       |
| 13     | Spyo/FIE-Fup    | ACATATGACCCAACATTATTATG        | Protein overproduction       |
| 14     | Spyo/FIE-Flw    | AGGATCCATTTCTTAAACTCCC         | Protein overproduction       |
| 15     | Spyo/FIE-Eup    | ACATATGTCACAAACCAATGCG         | Protein overproduction       |
| 16     | Spyo/FIE-Elw    | GGATCCGATAGGGGACACGAGAG        | Protein overproduction       |
| 17     | Spyo/RBS-HEFup  | GAGCTCAAGGAGAACAAGACATGATTACAG | Heterologous complementation |

| <b>Primer</b> | <b>Name</b>    | <b>Sequence (5'→3')</b>         | <b>Applications</b>          |
|---------------|----------------|---------------------------------|------------------------------|
| 18            | Spyo/RBS-HEFlw | CTGCAGAGCACTATTAGAGTCC          | Heterologous complementation |
| 19            | Spyo/RBS-FIEup | GAGCTCAAGGAGAGAGACAAATGACCCAAC  | Heterologous complementation |
| 20            | Spyo/RBS-FIElw | CTGCAGGAGAGCTTTCTAGTAGC         | Heterologous complementation |
| 21            | Spyo/RBS-I2up  | GAGCTCAAGGAGAGACACTTATGCCTCAGA  | Heterologous complementation |
| 22            | Spyo/RBS-I2lw  | CTGCAGATGGACTGTCTAGCTG          | Heterologous complementation |
| 23            | Spn/RBS-HEFup  | TCTAGAAGGAGATTACACAATGGTAACCG   | Heterologous complementation |
| 24            | Spn/RBS-HEFlw  | CTGCAGTGAGAGTGATGGAGAATTAG      | Heterologous complementation |
| 25            | Spn/RBS-I2up   | TCTAGAAGGAGAGGTACATATGAAGAC     | Heterologous complementation |
| 26            | Spn/RBS-I2lw   | CTGCAGCATTGAGTATTAATTCTCC       | Heterologous complementation |
| 27            | Spyo/RBS-I*up  | GAGCTCAAGGAGATTAAGAAATGGCAGAGC  | Heterologous complementation |
| 28            | Spyo/RBS-I*lw  | CTGCAGGTGCATTTAATGAGAGG         | Heterologous complementation |
| 29            | Spyo/RBS-E*up  | GAGCTCAAGGAGCACACCCATGTCACAAACC | Heterologous complementation |
| 30            | Spyo/RBS-E*lw  | CTGCAGATAGGGGACACGAGAG          | Heterologous complementation |

**Suppl. Table II.** Important residues in NrdE and NrdA subunits.

| <i>E. coli</i><br>NrdA | <i>S. typhimurium</i><br>NrdE | <i>S. pyogenes</i><br>NrdE | <i>S. pyogenes</i><br>NrdE* | <i>S. pneumoniae</i><br>NrdE | Function                                   |
|------------------------|-------------------------------|----------------------------|-----------------------------|------------------------------|--------------------------------------------|
| S224                   | S168                          | S171                       | S169                        | S171                         | Active site                                |
| C225                   | C169                          | C172                       | C170                        | C172                         | Active site, redox active cysteine         |
| D232                   | D176                          | D179                       | D177                        | D179                         | Allosteric specificity site                |
| R262                   | R206                          | R209                       | R207                        | R209                         | Allosteric specificity site                |
| I268                   | I212                          | I215                       | I213                        | I215                         | Allosteric specificity site                |
| R329                   | R271                          | R276                       | R274                        | R276                         | R2 interaction area                        |
| N437                   | N377                          | N380                       | N380                        | N380                         | Active site                                |
| L438                   | L378                          | L381                       | L381                        | L381                         | Active site                                |
| C439                   | C379                          | C382                       | C382                        | C382                         | Active site, transient thiyl radical       |
| E441                   | E381                          | E384                       | E384                        | E384                         | Active site, base in the catalysis         |
| C462                   | C406                          | C409                       | C409                        | C409                         | Active site, redox active cysteine         |
| L464                   | L408                          | L411                       | L411                        | L411                         | Active site                                |
| P621                   | P579                          | P580                       | P582                        | P580                         | Active site                                |
| Y730                   | Y683                          | Y697                       | Y687                        | Y697                         | Electron transfer chain                    |
| Y731                   | Y684                          | Y698                       | Y688                        | Y698                         | Electron transfer chain                    |
| C754                   | C700                          | C714                       | C721                        | C714                         | Redox active cysteine, Trx/Grx interaction |
| C759                   | C703                          | C717                       | C724                        | C717                         | Redox active cysteine, Trx/Grx interaction |

Suppl. **Table III.** Important residues in NrdF and NrdB subunits.

| <i>E. coli</i><br>NrdB | <i>S. typhimurium</i><br>NrdF | <i>S. pyogenes</i><br>NrdF | <i>S. pyogenes</i><br>NrdF* | <i>S. pneumoniae</i><br>NrdF | Function                                     |
|------------------------|-------------------------------|----------------------------|-----------------------------|------------------------------|----------------------------------------------|
| W48                    | W31                           | W30                        | W49                         | W30                          | Electron transfer chain                      |
| D84                    | D67                           | D66                        | D85                         | D66                          | Iron ligand, electron transfer chain         |
| <b>E115</b>            | E98                           | E97                        | <b>V116</b>                 | E97                          | <b>Iron ligand</b>                           |
| H118                   | H101                          | H100                       | H119                        | H100                         | Iron ligand, electron transfer chain         |
| Y122                   | Y105                          | Y104                       | Y123                        | Y104                         | Stable tyrosyl radical                       |
| <b>E204</b>            | E158                          | E157                       | <b>P176</b>                 | E157                         | <b>Iron ligand</b>                           |
| <b>F208</b>            | F162                          | F161                       | <b>L180</b>                 | F161                         | <b>Hydrophobic pocket, radical stability</b> |
| Y209                   | Y163                          | Y162                       | Y181                        | Y162                         | Channel to hydrophobic pocket                |
| S211                   | G165                          | G164                       | G183                        | G164                         | Channel to hydrophobic pocket                |
| F212                   | F166                          | F165                       | F184                        | F165                         | Hydrophobic pocket                           |
| I234                   | I188                          | I187                       | I206                        | I187                         | Hydrophobic pocket                           |
| R236                   | R190                          | R189                       | R208                        | R189                         | R1 interaction, radical transport?           |
| D237                   | D191                          | D190                       | D209                        | D190                         | Electron transfer chain                      |
| <b>E238</b>            | E192                          | E191                       | <b>K210</b>                 | E191                         | <b>Iron ligand</b>                           |
| H241                   | H195                          | H194                       | H213                        | H194                         | Iron ligand                                  |
| E350                   | S298                          | S296                       | S316                        | S296                         | R1 interaction                               |
| Y356                   | Y304                          | Y302                       | Y322                        | Y302                         | Electron transfer chain                      |
